# Supplementary material
Source: PubMed Central journal article supplement (PMC2430365)
Supplement: 0803525105_Supplemental_PDF.pdf [file 0803525105_Supplemental_PDF.pdf]

# Supporting Information

Sun et al. 10.1073/pnas.0803525105

Table S1. Oligonucleotide primers

| Purpose                                      | Sequence                                                                                                                                |
|----------------------------------------------|-----------------------------------------------------------------------------------------------------------------------------------------|
| <i>hmsS</i> deletion—upstream flanking DNA   | tcg <u>ttcag</u> aaaaccattcagcagcac<br>att <u>ctg</u> cagattccacctccaatgcc                                                              |
| <i>hmsS</i> deletion—downstream flanking DNA | att <u>ctg</u> cagcgccactctattatgaatccg<br>attg <u>agct</u> caggaatcacatttcactcac                                                       |
| <i>rcsB</i> deletion                         | gatttttcatcaccagactgttgaggaaggtaaccataaccattccgggatccgctgacc<br>gtattgcagagcaaaactgggcttgagagtcgagcggggcaaaaatgtgtaggctggagctgcttcg     |
| <i>rcsB</i> cloning                          | agttccatggacaaccttaatgaattattgctgatgacc<br>agct <u>aagctt</u> cagttctttaccactggc                                                        |
| <i>rcsA-pe</i> deletion                      | tgtttgcgactaaatagattgctgtcagacaaggatgtaaatcatattccgggatccgctgacc<br>agaatggaatgtattgtgtcgataattatgattatcagtaataagtgtaggctggagctgcttcg   |
| <i>rcsA-pstb</i> substitution                | aaagaactgtaccgacattac<br>ctaag <u>agct</u> cgatagggggcaatattatcgac                                                                      |
| <i>rcsD</i> deletion                         | gcgccagagccgctcacgcgctaaccaagggaatcggcattatcgttattccgggatccgctgacc<br>tcggccaatgcttggttaaggaaaggataattaagattacatctgtgtaggctggagctgcttcg |
| <i>rcsD-pstb</i> substitution                | tgacgcatgcgccctgtttcaataactattcc<br>ctaagagctcagcttactcctgattacgactc                                                                    |
| <i>rcsD</i> cloning                          | gcacaaaatacaccaacaag<br>agct <u>aagctt</u> accttcctgcaacagtc                                                                            |

Underlines show added restriction sites.
